# Supplementary material for: Unravelling the thermal behavior and kinetics of unsaturated polyester resin supplemented with organo-nanoclay
Source: Royal Society of Chemistry journal article supplement (doi:10.1039/d3ra06076d), 2024-01-01

### Supplementary materials

#### Global heat flow and conversion Vs temperature

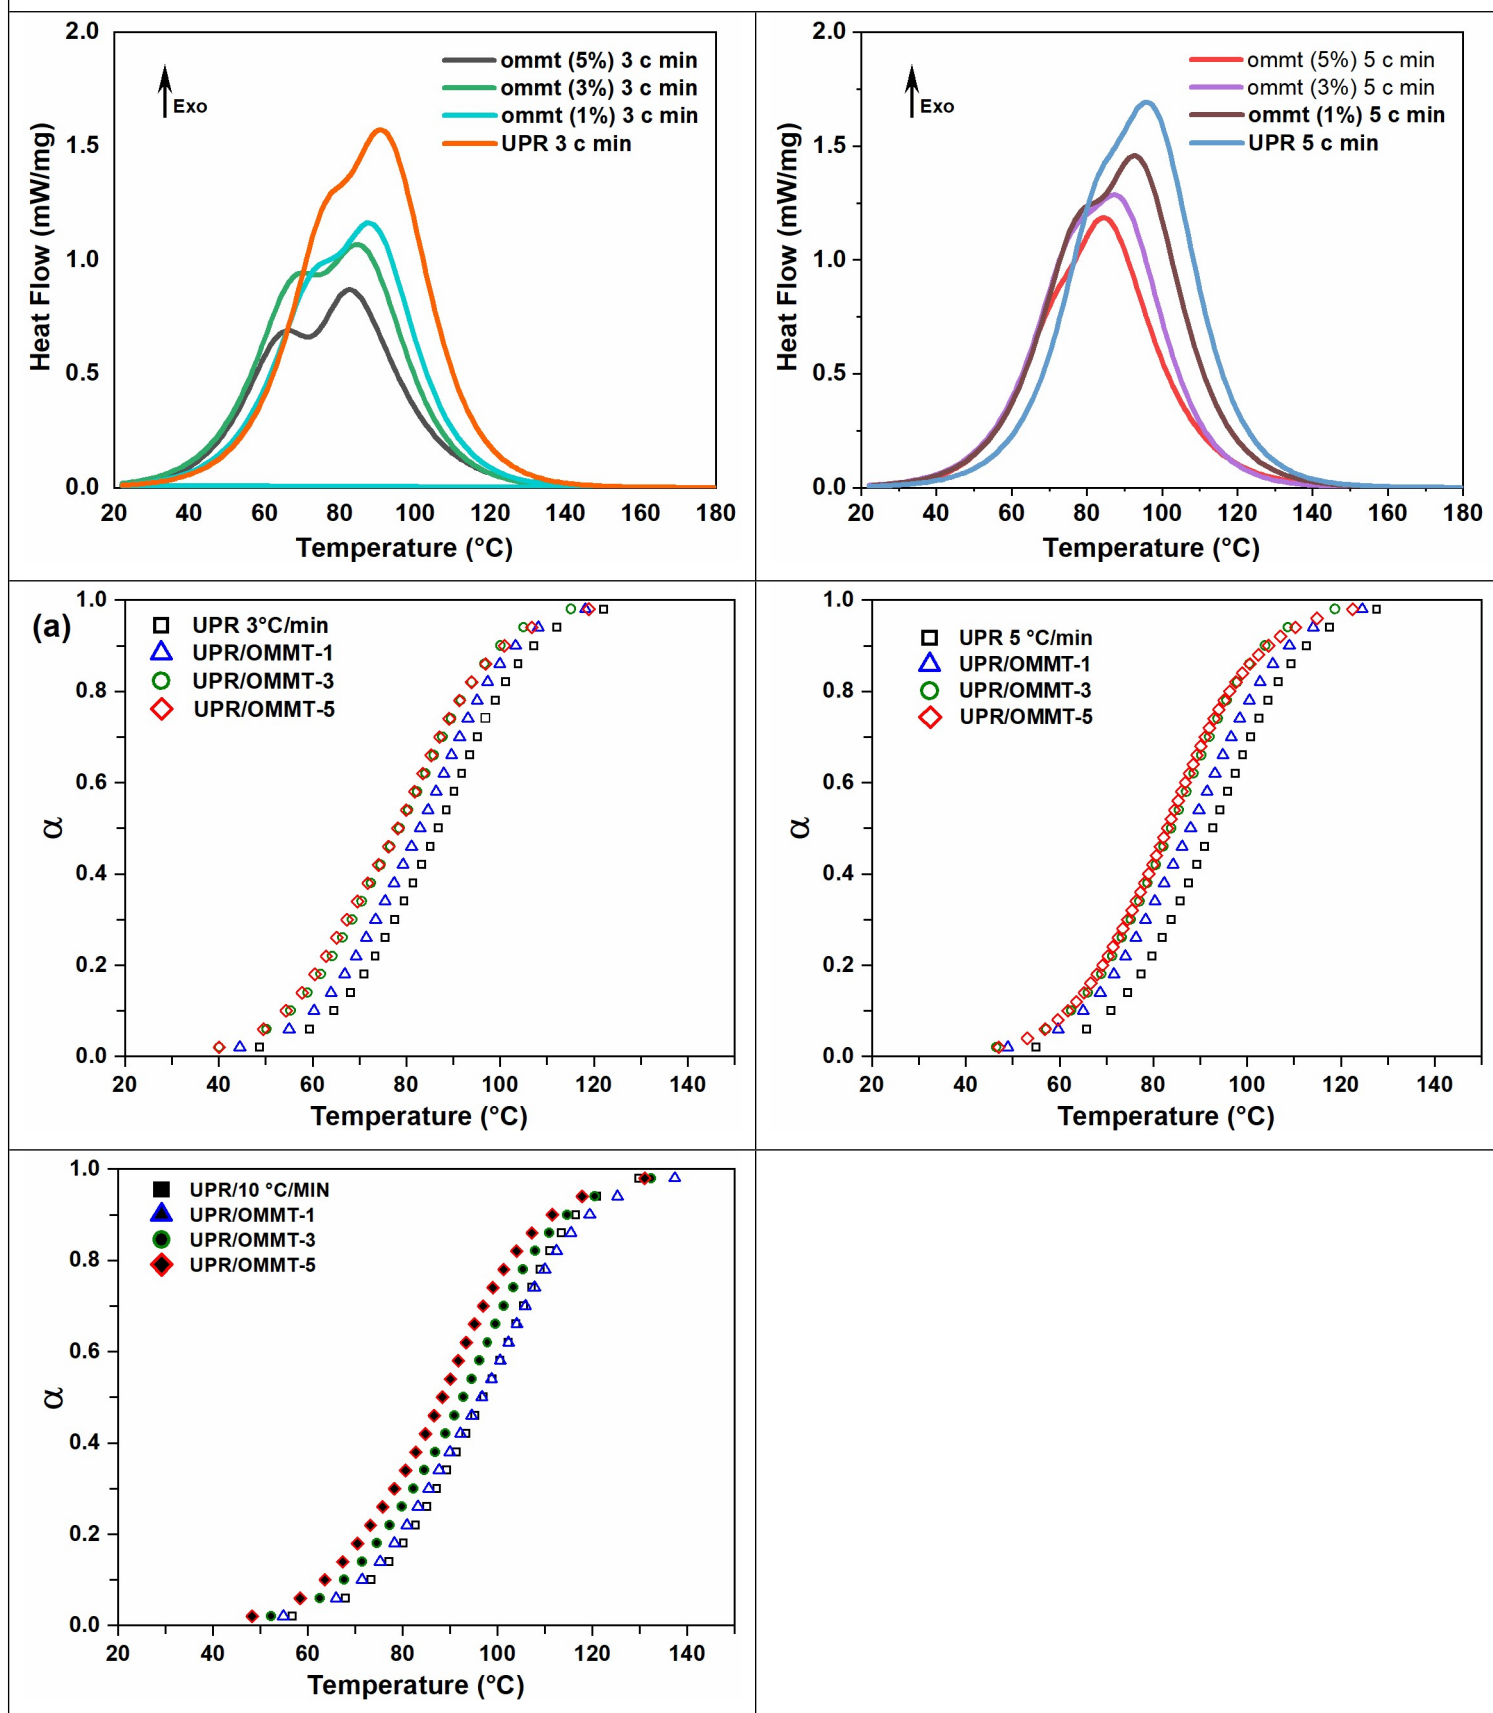

### Ox-red reaction of peroxyde at low temperatue

Log (A1) Vs conversion (TAS)

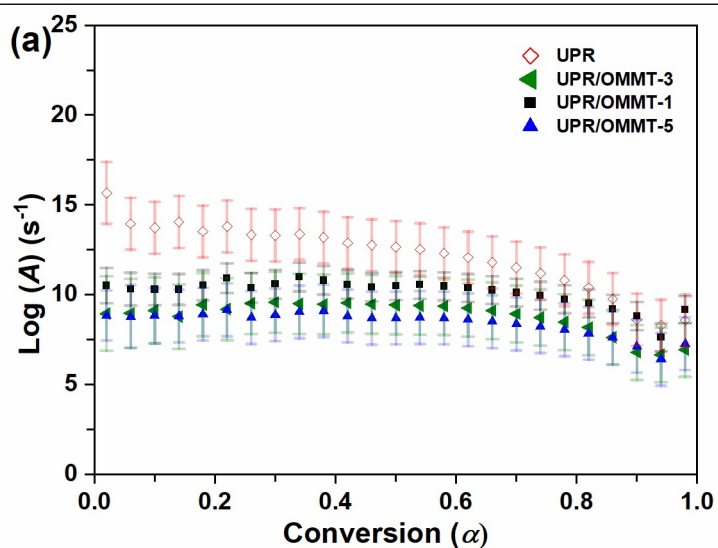

Log (A1) Vs conversion (VYA/CE 3°C/min)

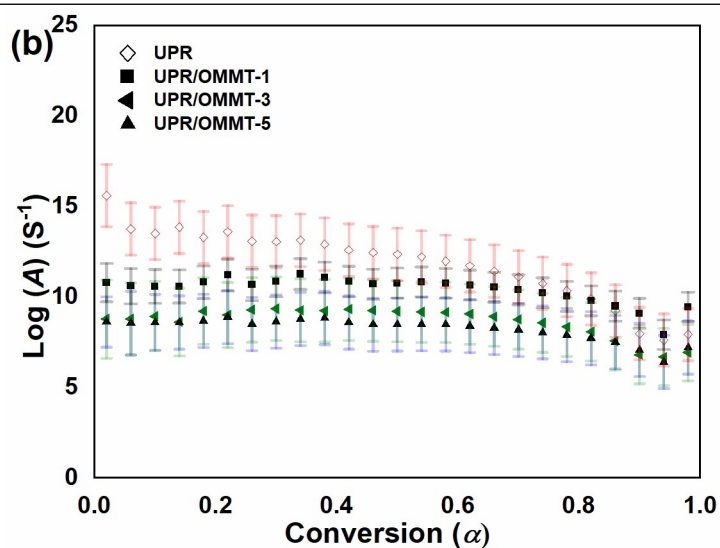

Log (A1) Vs conversion (VYA/CE 5°C/min)

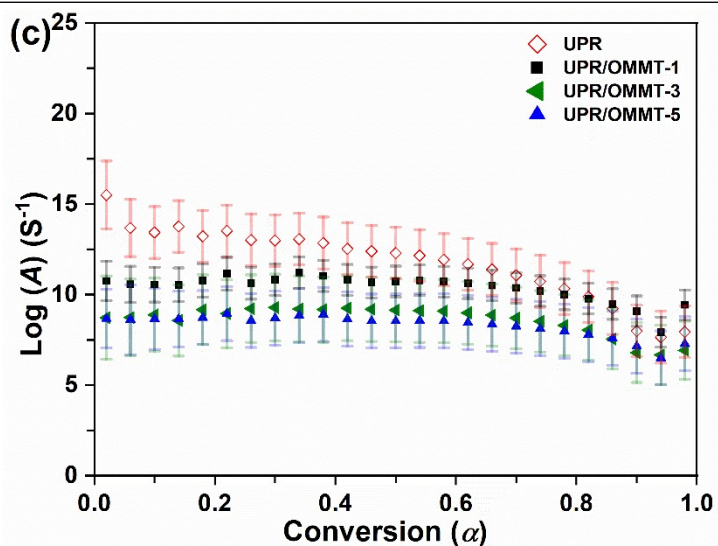

Log (A1) Vs conversion (VYA/CE 10°C/min)

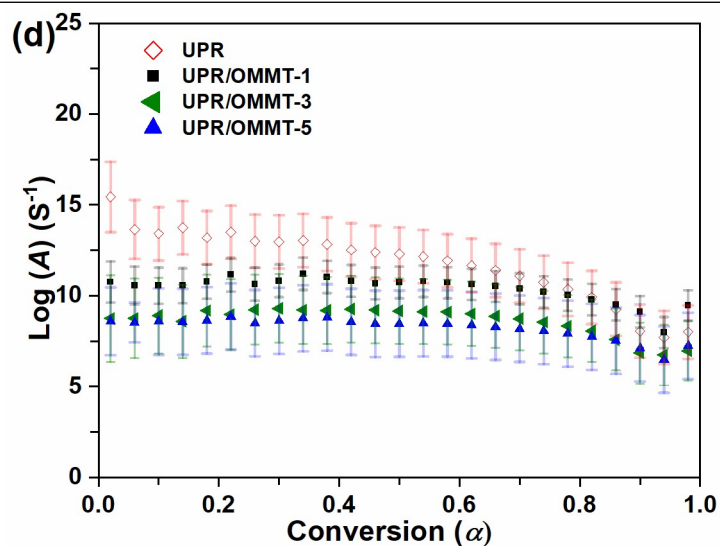

### Thermal decomposition of peroxide at high temperature

**Log (A2) Vs conversion (TAS)**

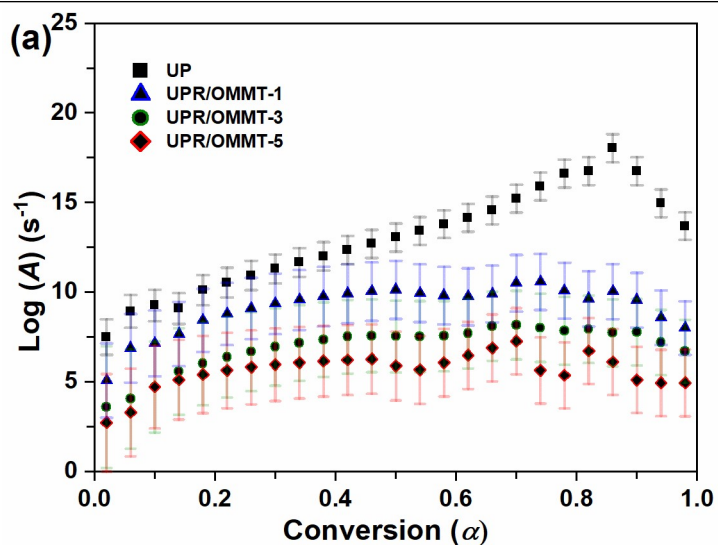

**Log (A2) Vs conversion (VYA/CE 3°C/min)**

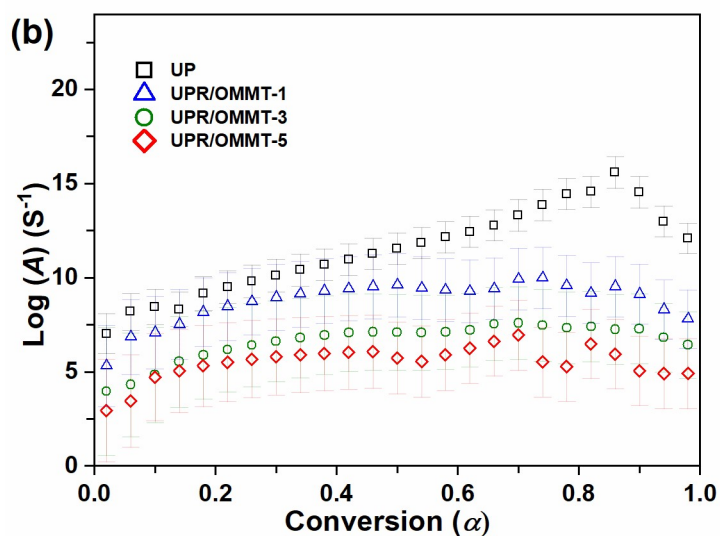

**Log (A2) Vs conversion (VYA/CE 5°C/min)**

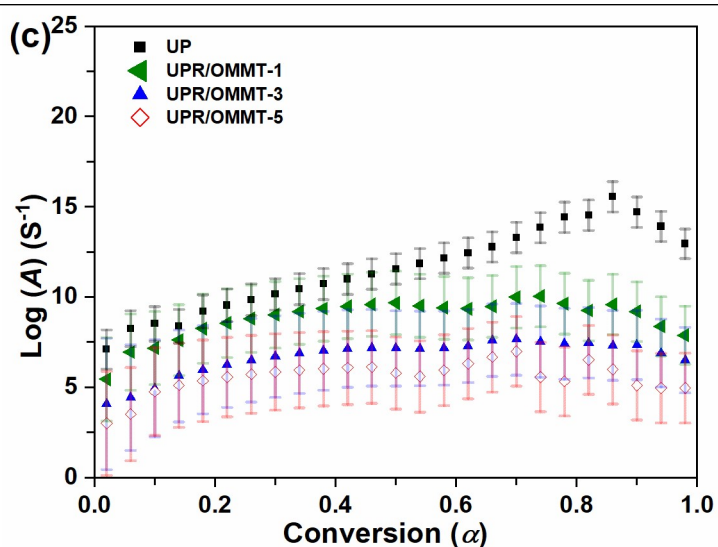

**Log (A2) Vs conversion (VYA/CE 10°C/min)**

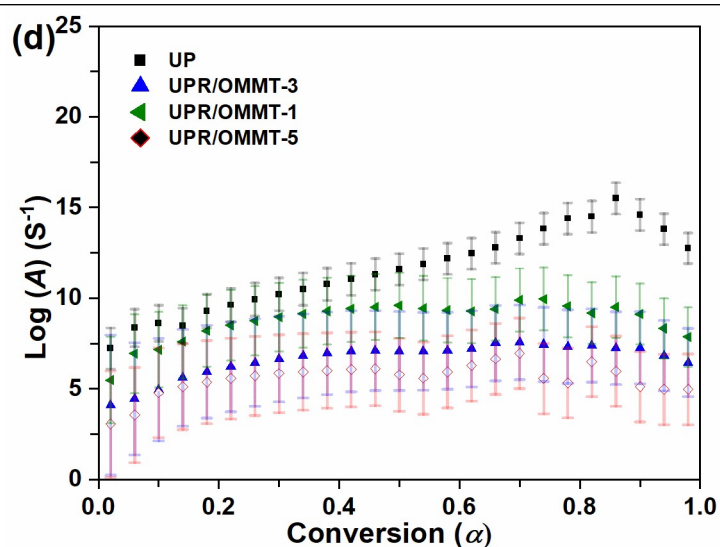

Supplement: d3ra06076d1.pdf [file d3ra06076d1.pdf]
